# Supplementary material for: The Bond Strength and Antibacterial Activity of the Universal Dentin Bonding System: A Systematic Review and Meta-Analysis
Source: MDPI journal article supplement (doi:10.3390/microorganisms9061230), 2021-06-06
Supplement: s1 [file s1]

**Table S1.** Search strategy used in Scielo.

| <b>Search strategy</b> |                                                                                                                                                                                                                                                                                                                                                                                |
|------------------------|--------------------------------------------------------------------------------------------------------------------------------------------------------------------------------------------------------------------------------------------------------------------------------------------------------------------------------------------------------------------------------|
| # 1                    | Microbial viability OR Antibacterial OR Antimicrobial OR peptide antibacterial OR Antibacterial activity OR Anti-Infective Agents OR Anti Infective Agents OR Antiinfective Agents OR Microbicides OR Antimicrobial Agents OR Anti-Microbial Agents OR Anti Microbial Agents OR anti-Bacterial Agents OR Anti Bacterial Agents OR Antibacterial Agents OR Biofilm OR Bacterial |
| # 2                    | Universal adhesives OR Universal adhesive OR Universal simplified adhesive systems OR Universal Dental Adhesives OR Multipurpose adhesives OR multi-purpose adhesives OR multimode adhesives OR multi-mode adhesives OR universal bonding agent                                                                                                                                |
| # 3                    | #1 and #2                                                                                                                                                                                                                                                                                                                                                                      |

**Table S2.** Search strategy used in ISI Web of Science.

| <b>Search strategy</b> |                                                                                                                                                                                                                                                                                                                                                                                |
|------------------------|--------------------------------------------------------------------------------------------------------------------------------------------------------------------------------------------------------------------------------------------------------------------------------------------------------------------------------------------------------------------------------|
| # 1                    | Microbial viability OR Antibacterial OR Antimicrobial OR peptide antibacterial OR Antibacterial activity OR Anti-Infective Agents OR Anti Infective Agents OR Antiinfective Agents OR Microbicides OR Antimicrobial Agents OR Anti-Microbial Agents OR Anti Microbial Agents OR anti-Bacterial Agents OR Anti Bacterial Agents OR Antibacterial Agents OR Biofilm OR Bacterial |
| # 2                    | Universal adhesives OR Universal adhesive OR Universal simplified adhesive systems OR Universal Dental Adhesives OR Multipurpose adhesives OR multi-purpose adhesives OR multimode adhesives OR multi-mode adhesives OR universal bonding agent                                                                                                                                |
| # 3                    | #1 and #2                                                                                                                                                                                                                                                                                                                                                                      |

**Table S3.** Search strategy used in SCOPUS.

| Search strategy |                                                                                                                                                                                                                                                                                                                                                                                                                 |
|-----------------|-----------------------------------------------------------------------------------------------------------------------------------------------------------------------------------------------------------------------------------------------------------------------------------------------------------------------------------------------------------------------------------------------------------------|
| # 1             | Microbial viability" OR "Antibacterial" OR "Antimicrobial" OR "peptide antibacterial" OR "Antibacterial activity" OR "Anti-Infective Agents" OR "Anti Infective Agents" OR "Antiinfective Agents" OR "Microbicides" OR "Antimicrobial Agents" OR "Anti-Microbial Agents" OR "Anti Microbial Agents" OR "anti-Bacterial Agents" OR "Anti Bacterial Agents" OR "Antibacterial Agents" OR "Biofilm" OR "Bacterial" |
| # 2             | "universal adhesives" OR "Universal adhesive" OR "Universal simplified adhesive systems" OR "Universal Dental Adhesives" OR "Multipurpose adhesives" OR "multi-purpose adhesives" OR "multimode adhesives" OR "multi-mode adhesives" OR "universal bonding agent"                                                                                                                                               |
| # 3             | #1 and #2                                                                                                                                                                                                                                                                                                                                                                                                       |

**Table S4.** Search strategy used in EMBASE.

| Search strategy |                                                                                                                                                                                                                                                                                                                                                                                                                  |
|-----------------|------------------------------------------------------------------------------------------------------------------------------------------------------------------------------------------------------------------------------------------------------------------------------------------------------------------------------------------------------------------------------------------------------------------|
| # 1             | 'Microbial viability' OR 'Antibacterial' OR 'Antimicrobial' OR 'peptide antibacterial' OR 'Antibacterial activity' OR 'Anti-Infective Agents' OR 'Anti Infective Agents' OR 'Antiinfective Agents' OR 'Microbicides' OR 'Antimicrobial Agents' OR 'Anti-Microbial Agents' OR 'Anti Microbial Agents' OR 'anti-Bacterial Agents' OR 'Anti Bacterial Agents' OR 'Antibacterial Agents' OR 'Biofilm' OR 'Bacterial' |
| # 2             | 'universal adhesives' OR 'Universal adhesive' OR 'Universal simplified adhesive systems' OR 'Universal Dental Adhesives' OR 'Multipurpose adhesives' OR 'multi-purpose adhesives' OR 'multimode adhesives' OR 'multi-mode adhesives' OR 'universal bonding agent'                                                                                                                                                |
| # 3             | #1 and #2                                                                                                                                                                                                                                                                                                                                                                                                        |

**Table S5.** Excluded studies

| <b>Study</b>              | <b>Reason for exclusion</b>                                                                                                                                     |
|---------------------------|-----------------------------------------------------------------------------------------------------------------------------------------------------------------|
| <b>Maryoosh, 2020</b>     | The presence of 0 values in Agar diffusion test which cannot be analyzed                                                                                        |
| <b>Almaroof, 2017</b>     | The presence of 0 values in Agar diffusion test which cannot be analyzed, and for dentin push-out bond strength there was not enough study group for comparison |
| <b>Bosso André, 2017</b>  | The presence of 0 values in Agar diffusion test which cannot be analyzed                                                                                        |
| <b>Boutsiouki, 2019</b>   | There was not enough study group for comparison                                                                                                                 |
| <b>Brambilla, 2017</b>    | There was not enough study group for comparison                                                                                                                 |
| <b>Cangul, 2020</b>       | The antibacterial agent is not included in the adhesive                                                                                                         |
| <b>Bosso André, 2015</b>  | For antibacterial activity, data was not in mean and SD                                                                                                         |
| <b>Peng, 2020</b>         | The antibacterial agent is not included in the adhesive                                                                                                         |
| <b>Cha, 2016</b>          | For the antibacterial activity, SD could not be obtained. The antibacterial agent is not included in the adhesive                                               |
| <b>Barros Silva, 2021</b> | Composite disks were used as a bonding substrate                                                                                                                |
| <b>Atalayin, 2018</b>     | The presence of 0 values in Agar diffusion test which cannot be analyzed                                                                                        |
| <b>Zhang, 2020</b>        | The antibacterial agent is not included in the adhesive                                                                                                         |
| <b>Kim, 2017</b>          | The antibacterial agent is not included in the adhesive                                                                                                         |
